# Supplementary material
Source: PubMed Central journal article supplement (PMC3743239)
Supplement: NIHMS473809-supplement-01.pdf [file NIHMS473809-supplement-01.pdf]

Type of file: table

Label: Table S1

Filename: Supplemental\_Table\_1A-B.doc

**Supplemental Table 1A. Additional Findings in Wholebrain Analysis of BD vs. UD Comparison of Diffusivity Measures : BD [15] > UD [16]**

| WHOLEBRAIN REGIONS                   | Voxels                       | EMM FA* | 95% Confidence Intervals |        | FA        |            | $\lambda_{  }$   |         | $\lambda_{\perp}$ |         |      |
|--------------------------------------|------------------------------|---------|--------------------------|--------|-----------|------------|------------------|---------|-------------------|---------|------|
|                                      |                              |         | Lower                    | Higher | t-test ** | P value    | t-test **        | P value | t-test **         | P value |      |
| <b>RIGHT UNCINATE FASCICULUS</b>     | <b>[subgenual cortex]</b> 20 | BD      | 0.29                     | 0.26   | 0.32      | <b>3.8</b> | <b>&lt;0.05#</b> | 0.6     | .454              | 0.1     | .803 |
| [MNI coordinates x, y, z: 14,13,-10] |                              | UD      | 0.24                     | 0.21   | 0.26      |            |                  |         |                   |         |      |

\* Estimated Marginal Means (EMM) are evaluated at the covariate value of age = 34.5.

\* Positive values on t-student tests refer to diffusivity measures greater in BD than UD adults, while negative values refer to diffusivity measures less in BD depressed than UD adults.

**Supplemental Table 1B . Additional Findings in Wholebrain Analysis of BD vs. HC Comparison of Diffusivity Measures: BD [15] < HC [24]**

| WHOLEBRAIN REGIONS                            | Voxels                             | EMM FA* | 95% Confidence Intervals |        | FA        |             | $\lambda_{  }$   |         | $\lambda_{\perp}$ |            |              |
|-----------------------------------------------|------------------------------------|---------|--------------------------|--------|-----------|-------------|------------------|---------|-------------------|------------|--------------|
|                                               |                                    |         | Lower                    | Higher | t-test ** | P value     | t-test **        | P value | t-test **         | P value    |              |
| <b>RIGHT SUPERIOR LONGITUDINAL FASCICULUS</b> | <b>[primary sensory cortex]</b> 22 | BD      | 0.32                     | 0.29   | 0.35      | <b>-3.9</b> | <b>&lt;0.05#</b> | -2.5    | 0.124             | <b>4.7</b> | <b>0.037</b> |
| [MNI coordinates x, y, z: 40,-27,51]          |                                    | HC      | 0.39                     | 0.36   | 0.41      |             |                  |         |                   |            |              |

\* Estimated Marginal Means (EMM) are evaluated at the covariate value of age = 31.0.

\* Positive values on t-student tests refer to diffusivity measures greater in UD than HC adults, while negative values refer to diffusivity measures less in UD depressed than HC adults.

\*\* Monte Carlo simulation with alphasim correction was run on uncorrected t statistical maps ( $p < 0.001$ ), obtaining a dual thresholding of both type I error (alphasim  $p < 0.05$ , corrected) and cluster-size thresholding (t-tests  $CST_{\geq 18}$  voxels)

FA: Fractional Anisotropy;  $\lambda_{||}$ : Longitudinal Diffusivity;  $\lambda_{\perp}$ : Radial Diffusivity; BD; Bipolar Disorder individuals; UD: Unipolar Disorder individuals; HC: Healthy Control individuals.

Significant between-group comparisons in **bold**; trend between-group comparisons in *italic*

Type of file: table

Label: Table s2a

Filename: Supplemental\_Table\_2A.doc



|                                                                                                            |                   |        |            |                          |      |       |      |       |      |       |      |       |
|------------------------------------------------------------------------------------------------------------|-------------------|--------|------------|--------------------------|------|-------|------|-------|------|-------|------|-------|
| RIGHT UNCINATE FASCICULUS<br>[subgenual cortex]<br>[MNI coordinates x, y, z: 14,13,-10]                    | FA                | BD[15] | -0.1       | 0.603                    | -0.1 | 0.708 | 0.0  | 0.990 | -0.1 | 0.674 | -0.1 | 0.608 |
|                                                                                                            |                   | UD[16] | -0.4       | 0.107                    | -0.2 | 0.506 | -0.3 | 0.244 | -0.2 | 0.535 | -0.2 | 0.480 |
|                                                                                                            | $\lambda_{  }$    | BD[15] | <b>0.6</b> | <b>0.024<sup>§</sup></b> | 0.3  | 0.347 | 0.4  | 0.160 | -0.1 | 0.770 | 0.2  | 0.572 |
|                                                                                                            |                   | UD[16] | 0.1        | 0.649                    | 0.4  | 0.152 | -0.4 | 0.161 | 0.0  | 0.952 | 0.0  | 0.906 |
|                                                                                                            | $\lambda_{\perp}$ | BD[15] | <b>0.7</b> | <b>0.007<sup>§</sup></b> | 0.2  | 0.521 | 0.5  | 0.062 | 0.0  | 0.977 | 0.0  | 0.911 |
|                                                                                                            |                   | UD[16] | 0.2        | 0.368                    | 0.3  | 0.239 | -0.2 | 0.387 | 0.0  | 0.857 | 0.0  | 0.937 |
| RIGHT SUPERIOR LONGITUDINAL FASCICULUS<br>[primary sensory cortex]<br>[MNI coordinates x, y, z: 40,-27,51] | FA                | BD[15] | 0.1        | 0.612                    | -0.1 | 0.859 | 0.2  | 0.576 | 0.0  | 0.970 | -0.2 | 0.590 |
|                                                                                                            |                   | HC[24] | 0.1        | 0.677                    | n/a  | n/a   | n/a  | n/a   | n/a  | n/a   | n/a  | n/a   |
|                                                                                                            | $\lambda_{  }$    | BD[15] | -0.4       | 0.114                    | -0.2 | 0.385 | 0.0  | 0.899 | 0.0  | 0.965 | 0.0  | 0.929 |
|                                                                                                            |                   | HC[24] | 0.1        | 0.700                    | n/a  | n/a   | n/a  | n/a   | n/a  | n/a   | n/a  | n/a   |
|                                                                                                            | $\lambda_{\perp}$ | BD[15] | -0.3       | 0.265                    | -0.1 | 0.624 | 0.0  | 0.980 | -0.1 | 0.679 | 0.3  | 0.343 |
|                                                                                                            |                   | HC[24] | -0.1       | 0.497                    | n/a  | n/a   | n/a  | n/a   | n/a  | n/a   | n/a  | n/a   |

FA: Fractional Anisotropy;  $\lambda_{||}$ : Longitudinal Diffusivity;  $\lambda_{\perp}$ : Radial Diffusivity; BD: Bipolar Disorder individuals; UD: Unipolar Disorder individuals; HC: Healthy Control individuals.

BD and UD: Statistical threshold of  $p=0.05/10=0.005$ , **in bold** to control for multiple comparisons; trend range of  $0.005 < p \leq 0.05$ , **in bold-italic**.

HC: Statistical threshold of  $p=0.05$ , **in bold**; trend range of  $0.05 < p \leq 0.099$ , **in bold-italic**.

<sup>§</sup> Positive relationship; <sup>&</sup> negative relationship.

Type of file: table

Label: Table s2b

Filename: Supplemental\_Table\_2B.doc

**Supplemental Table 2B. Relationships Between Diffusivity Measures in Regions that Significantly Differentiated BD and UD Depressed Adults and Dichotomous Clinical Variables in 15 BD and 16 UD Depressed Adults.**

| WHOLEBRAIN REGIONS                                                                                                 | Group [N]      | Dichotomous Variables |         |       |         |       |         |       |         |                            |         |       |
|--------------------------------------------------------------------------------------------------------------------|----------------|-----------------------|---------|-------|---------|-------|---------|-------|---------|----------------------------|---------|-------|
|                                                                                                                    |                | MS                    |         | AP    |         | AD    |         | BDZ   |         | Drugs/Alcohol <sup>#</sup> |         |       |
|                                                                                                                    |                | MWU                   | P value | MWU   | P value | MWU   | P value | MWU   | P value | MWU                        | P value |       |
| <b>LEFT SUPERIOR LONGITUDINAL FASCICULUS</b><br>[inferior temporal cortex]<br>[MNI coordinates x,y,z: -50,-38,-15] | FA             | BD[15]                | 23.0    | 0.859 | 24.0    | 0.953 | 25.0    | 0.779 | 16.0    | 0.224                      | 16.0    | 0.622 |
|                                                                                                                    |                | UD[16]                | n/a     | n/a   | 3.0     | 0.500 | 14.0    | 1.000 | 24.0    | 0.743                      | 15.0    | 0.611 |
|                                                                                                                    | $\lambda_{  }$ | BD[15]                | 21.0    | 0.679 | 15.0    | 0.254 | 13.0    | 0.094 | 22.0    | 0.607                      | 12.0    | 0.284 |
|                                                                                                                    |                | UD[16]                | n/a     | n/a   | 1.0     | 0.250 | 11.0    | 0.700 | 23.0    | 0.661                      | 17.0    | 0.800 |
| $\lambda_{\perp}$                                                                                                  | BD[15]         | 22.0                  | 0.768   | 17.0  | 0.371   | 15.0  | 0.152   | 18.0  | 0.328   | 14.0                       | 0.435   |       |
|                                                                                                                    | UD[16]         | n/a                   | n/a     | 3.0   | 0.500   | 13.0  | 0.933   | 26.0  | 0.913   | 15.0                       | 0.611   |       |
| <b>LEFT SUPERIOR LONGITUDINAL FASCICULUS</b><br>[primary sensory cortex]<br>[MNI coordinates x,y,z: -47,-19,47]    | FA             | BD[15]                | 23.0    | 0.859 | 19.0    | 0.513 | 20.0    | 0.397 | 26.0    | 0.955                      | 9.0     | 0.127 |
|                                                                                                                    |                | UD[16]                | n/a     | n/a   | 4.0     | 0.625 | 11.0    | 0.700 | 15.0    | 0.180                      | 17.0    | 0.800 |
|                                                                                                                    | $\lambda_{  }$ | BD[15]                | 22.0    | 0.768 | 23.0    | 0.859 | 25.0    | 0.779 | 24.0    | 0.776                      | 14.0    | 0.435 |
|                                                                                                                    |                | UD[16]                | n/a     | n/a   | 7.0     | 1.000 | 13.0    | 0.933 | 23.0    | 0.661                      | 8.0     | 0.146 |
| $\lambda_{\perp}$                                                                                                  | BD[15]         | 21.0                  | 0.679   | 24.0  | 0.953   | 19.0  | 0.336   | 16.0  | 0.224   | 18.0                       | 0.833   |       |
|                                                                                                                    | UD[16]         | n/a                   | n/a     | 6.0   | 0.875   | 10.0  | 0.600   | 15.0  | 0.180   | 15.0                       | 0.611   |       |
| <b>LEFT INFERIOR LONGITUDINAL FASCICULUS</b><br>[lateral occipital cortex]<br>[MNI coordinates x,y,z: -28,-66,40]  | FA             | BD[15]                | 14.0    | 0.206 | 14      | 0.206 | 21.0    | 0.463 | 16.0    | 0.224                      | 16.0    | 0.622 |
|                                                                                                                    |                | UD[16]                | n/a     | n/a   | 4.0     | 0.625 | 12.0    | 0.817 | 21.0    | 0.510                      | 7.0     | 0.111 |
|                                                                                                                    | $\lambda_{  }$ | BD[15]                | 25.0    | 1.000 | 24.0    | 0.953 | 19.0    | 0.336 | 26.0    | 0.955                      | 18.0    | 0.833 |
|                                                                                                                    |                | UD[16]                | n/a     | n/a   | 0.0     | 0.125 | 13.0    | 0.933 | 14.0    | 0.145                      | 6.0     | 0.082 |
| $\lambda_{\perp}$                                                                                                  | BD[15]         | 16.0                  | 0.310   | 19.0  | 0.513   | 16.0  | 0.189   | 16.0  | 0.224   | 17.0                       | 0.724   |       |
|                                                                                                                    | UD[16]         | n/a                   | n/a     | 1.0   | 0.250   | 11.0  | 0.700   | 20.0  | 0.441   | 5.0                        | 0.057   |       |
| <b>RIGHT UNCINATE FASCICULUS</b><br>[orbitofrontal cortex]<br>[MNI coordinates x,y,z: 26,26,-11]                   | FA             | BD[15]                | 23.0    | 0.859 | 21.0    | 0.679 | 12.0    | 0.072 | 24.0    | 0.776                      | 16.0    | 0.622 |
|                                                                                                                    |                | UD[16]                | n/a     | n/a   | 2.0     | 0.375 | 7.0     | 0.333 | 21.0    | 0.510                      | 11.0    | 0.296 |
|                                                                                                                    | $\lambda_{  }$ | BD[15]                | 14.5    | 0.206 | 24.5    | 0.953 | 13.5    | 0.094 | 21.0    | 0.529                      | 18.5    | 0.833 |
|                                                                                                                    |                | UD[16]                | n/a     | n/a   | 0.0     | 0.125 | 7.0     | 0.333 | 12.0    | 0.090                      | 19.0    | 1.000 |
| $\lambda_{\perp}$                                                                                                  | BD[15]         | 25.0                  | 1.000   | 25.0  | 1.000   | 18.0  | 0.281   | 26.0  | 0.955   | 16.0                       | 0.622   |       |
|                                                                                                                    | UD[16]         | n/a                   | n/a     | 0.0   | 0.125   | 14.0  | 1.000   | 13.0  | 0.115   | 13.0                       | 0.439   |       |
| <b>RIGHT UNCINATE FASCICULUS</b><br>[subgenual cortex]<br>[MNI coordinates x,y,z: 14,13,-10]                       | FA             | BD[15]                | 24.0    | 0.953 | 16      | 0.310 | 24.0    | 0.694 | 13.0    | 0.113                      | 14.0    | 0.435 |
|                                                                                                                    |                | UD[16]                | n/a     | n/a   | 2.0     | 0.375 | 13.0    | 0.933 | 23.0    | 0.661                      | 16.0    | 0.704 |
|                                                                                                                    | $\lambda_{  }$ | BD[15]                | 24.0    | 0.953 | 18.0    | 0.440 | 23.0    | 0.613 | 23.0    | 0.689                      | 13.0    | 0.354 |
|                                                                                                                    |                | UD[16]                | n/a     | n/a   | 6.0     | 0.875 | 13.0    | 0.933 | 16.0    | 0.221                      | 15.0    | 0.611 |
| $\lambda_{\perp}$                                                                                                  | BD[15]         | 21.5                  | 0.679   | 21.5  | 0.679   | 20.5  | 0.397   | 19.5  | 0.388   | 9.0                        | 0.127   |       |
|                                                                                                                    | UD[16]         | n/a                   | n/a     | 6.0   | 0.875   | 12.0  | 0.817   | 19.0  | 0.377   | 15.0                       | 0.611   |       |
| <b>RIGHT SUPERIOR LONGITUDINAL FASCICULUS</b><br>[primary sensory cortex]<br>[MNI coordinates x,y,z: 40,-27,51]    | FA             | BD[15]                | 23.0    | 0.859 | 15.0    | 0.254 | 23.0    | 0.613 | 27.0    | 1.000                      | 20.0    | 1.000 |
|                                                                                                                    |                | HC[24]                | n/a     | n/a   | 7.0     | 1.000 | 10.0    | 0.600 | 18.0    | 0.320                      | 19.0    | 1.000 |
|                                                                                                                    | $\lambda_{  }$ | BD[15]                | 23.0    | 0.859 | 23.0    | 0.859 | 25.0    | 0.779 | 17.0    | 0.272                      | 17.0    | 0.724 |
|                                                                                                                    |                | HC[24]                | n/a     | n/a   | 1.0     | 0.250 | 5.0     | 0.200 | 11.0    | 0.069                      | 16.0    | 0.704 |
| $\lambda_{\perp}$                                                                                                  | BD[15]         | 18.0                  | 0.440   | 17.0  | 0.371   | 26.0  | 0.867   | 25.0  | 0.864   | 15.0                       | 0.524   |       |
|                                                                                                                    | HC[24]         | n/a                   | n/a     | 2.0   | 0.375   | 12.0  | 0.817   | 18.0  | 0.320   | 19.0                       | 1.000   |       |

BD=Bipolar Disorder individuals; UD=Unipolar Disorder individuals; MS= mood stabilizer; AP=antipsychotics; AD=antidepressants; BDZ=benzodiazepines; Drugs/Alcohol= lifetime prevalence of drugs/alcohol abuse/dependence;  $\lambda_{||}$ =Longitudinal Diffusivity;  $\lambda_{\perp}$ =Radial Diffusivity.

BD: Statistical threshold of  $p=0.05/10=0.005$ , to control for multiple comparisons; trend range of  $0.005 < p \leq 0.05$ , ***in bold-italic***.

# Missing information in 2 BD (females; 41 and 28year-old) about lifetime history of drug/alcohol abuse/dependence.



Type of file: table

Label: Tables s3a-b

Filename: Supplemental\_Table\_3A-B.doc

**Supplemental Table 3A. Main Effect of Group in Wholebrain Analysis of Diffusivity Measures in females only: BD [14], UD [12] and HC [15]**

| WHOLEBRAIN REGIONS                                                              | Voxels                     | EMM FA* | 95% Confidence Intervals |        | FA        |         | $\lambda_{  }$ |                  | $\lambda_{\perp}$ |              |            |              |
|---------------------------------------------------------------------------------|----------------------------|---------|--------------------------|--------|-----------|---------|----------------|------------------|-------------------|--------------|------------|--------------|
|                                                                                 |                            |         | Lower                    | Higher | f-test ** | P value | f-test *       | P value          | f-test *          | P value      |            |              |
|                                                                                 |                            |         |                          |        |           |         |                |                  |                   |              |            |              |
| RIGHT UNCINATE FASCICULUS<br>[MNI coordinates x, y, z: 26,26,-12]               | [orbitofrontal cortex]     | 14      | BD                       | 0.29   | 0.24      | 0.33    | <b>13.4</b>    | <b>&lt;0.05#</b> | <b>3.6</b>        | <b>0.036</b> | 1.6        | 0.208        |
|                                                                                 |                            |         | UD                       | 0.36   | 0.32      | 0.41    |                |                  |                   |              |            |              |
|                                                                                 |                            |         | HC                       | 0.40   | 0.35      | 0.44    |                |                  |                   |              |            |              |
| LEFT SUPERIOR LONGITUDINAL FASCICULUS<br>[MNI coordinates x, y, z: -51,-38,-16] | [inferior temporal cortex] | 14      | BD                       | 0.30   | 0.24      | 0.37    | <b>10.7</b>    | <b>&lt;0.05#</b> | 2.0               | 0.148        | <b>6.0</b> | <b>0.005</b> |
|                                                                                 |                            |         | UD                       | 0.47   | 0.40      | 0.54    |                |                  |                   |              |            |              |
|                                                                                 |                            |         | HC                       | 0.38   | 0.32      | 0.44    |                |                  |                   |              |            |              |
| LEFT SUPERIOR LONGITUDINAL FASCICULUS<br>[MNI coordinates x, y, z: -48,-48,-1]  | [middle temporal cortex]   | 10      | BD                       | 0.44   | 0.39      | 0.49    | <b>11.1</b>    | <b>&lt;0.05#</b> | 1.5               | 0.230        | <b>3.2</b> | <b>0.051</b> |
|                                                                                 |                            |         | UD                       | 0.54   | 0.49      | 0.59    |                |                  |                   |              |            |              |
|                                                                                 |                            |         | HC                       | 0.50   | 0.45      | 0.54    |                |                  |                   |              |            |              |

\* Estimated Marginal Means (EMM) are evaluated at the covariate value of age = 33.9.

\*\* Monte Carlo simulation with alphasim correction was run on uncorrected f statistical maps ( $p < 0.001$ ), obtaining a dual thresholding of both type I error (alphasim  $p < 0.05$ , corrected) and cluster-size thresholding (f-tests  $CST \geq 10$  voxels)

**Supplemental Table 3B. Post-hoc Comparisons in Wholebrain Analysis of Diffusivity Measures in females only: BD [14], UD [12] and HC [15]**

| WHOLEBRAIN REGIONS                                                              | Voxels                     | EMM FA* | 95% Confidence Intervals |        | FA        |         | $\lambda_{  }$ |                  | $\lambda_{\perp}$ |         |            |              |
|---------------------------------------------------------------------------------|----------------------------|---------|--------------------------|--------|-----------|---------|----------------|------------------|-------------------|---------|------------|--------------|
|                                                                                 |                            |         | Lower                    | Higher | t-test ** | P value | t-test *       | P value          | t-test *          | P value |            |              |
|                                                                                 |                            |         |                          |        |           |         |                |                  |                   |         |            |              |
| <b>BD &lt; UD</b>                                                               |                            |         |                          |        |           |         |                |                  |                   |         |            |              |
| LEFT SUPERIOR LONGITUDINAL FASCICULUS<br>[MNI coordinates x, y, z: -48,-48,-1]  | [middle temporal cortex]   | 22      | BD                       | 0.43   | 0.38      | 0.47    | <b>-4.7</b>    | <b>&lt;0.05#</b> | -1.0              | 0.382   | <b>4.2</b> | <b>0.022</b> |
|                                                                                 |                            |         | UD                       | 0.52   | 0.47      | 0.57    |                |                  |                   |         |            |              |
| LEFT SUPERIOR LONGITUDINAL FASCICULUS<br>[MNI coordinates x, y, z: -51,-38,-16] | [inferior temporal cortex] | 20      | BD                       | 0.30   | 0.23      | 0.37    | <b>-4.6</b>    | <b>&lt;0.05#</b> | -2.1              | 0.137   | <b>6.9</b> | <b>0.003</b> |
|                                                                                 |                            |         | UD                       | 0.47   | 0.39      | 0.54    |                |                  |                   |         |            |              |

\* Estimated Marginal Means (EMM) are evaluated at the covariate value of age = 31.8.

**BD < HC**

|                                                                                |                          |    |    |      |      |      |             |                  |             |              |     |       |
|--------------------------------------------------------------------------------|--------------------------|----|----|------|------|------|-------------|------------------|-------------|--------------|-----|-------|
| LEFT SUPERIOR LONGITUDINAL FASCICULUS<br>[MNI coordinates x, y, z: -38,-26,44] | [primary sensory cortex] | 22 | BD | 0.34 | 0.31 | 0.38 | <b>-4.4</b> | <b>&lt;0.05#</b> | <b>-5.8</b> | <b>0.006</b> | 2.7 | 0.077 |
|                                                                                |                          |    | HC | 0.44 | 0.40 | 0.47 |             |                  |             |              |     |       |
| RIGHT UNCINATE FASCICULUS<br>[MNI coordinates x,y,z: 26,26,-12]                | [orbitofrontal cortex]   | 22 | BD | 0.29 | 0.24 | 0.34 | <b>-5.1</b> | <b>&lt;0.05#</b> | <b>-3.0</b> | 0.063        | 1.8 | 0.178 |
|                                                                                |                          |    | HC | 0.40 | 0.35 | 0.44 |             |                  |             |              |     |       |

\* Estimated Marginal Means (EMM) are evaluated at the covariate value of age = 31.0.

**UD < HC and UD > HC**

|                                                                                 |                            |    |    |      |      |      |             |                  |      |       |             |              |
|---------------------------------------------------------------------------------|----------------------------|----|----|------|------|------|-------------|------------------|------|-------|-------------|--------------|
| LEFT SUPERIOR LONGITUDINAL FASCICULUS<br>[MNI coordinates x, y, z: -53,-41,-16] | [inferior temporal cortex] | 25 | UD | 0.42 | 0.34 | 0.50 | <b>4.8</b>  | <b>&lt;0.05#</b> | 1.3  | 0.282 | <b>-4.6</b> | <b>0.016</b> |
|                                                                                 |                            |    | HC | 0.29 | 0.22 | 0.36 |             |                  |      |       |             |              |
| LEFT UNCINATE FASCICULUS<br>[MNI coordinates x, y, z: -31,-24,-28]              | [entorhinal cortex]        | 25 | UD | 0.32 | 0.28 | 0.37 | <b>-4.0</b> | <b>&lt;0.05#</b> | -0.2 | 0.858 | 0.9         | 0.428        |
|                                                                                 |                            |    | HC | 0.36 | 0.32 | 0.40 |             |                  |      |       |             |              |

\* Estimated Marginal Means (EMM) are evaluated at the covariate value of age = 29.7.

\*\* Monte Carlo simulation with alphasim correction was run on uncorrected t statistical maps ( $p < 0.001$ ), obtaining a dual thresholding of both type I error (alphasim  $p < 0.05$ , corrected) and cluster-size thresholding (t-tests  $CST \geq 18$  voxels)

FA: Fractional Anisotropy;  $\lambda_{||}$ : Longitudinal Diffusivity;  $\lambda_{\perp}$ : Radial Diffusivity; BD; Bipolar Disorder individuals; UD: Unipolar Disorder individuals; HC: Healthy Control individuals.

Significant between-group comparisons in **bold**; trend between-group comparisons in *italic*.  $\lambda_{||}$  and  $\lambda_{\perp}$  extracted only in WM regions showing significant between-group differences upon FA; wholebrain analyses and/or corrections of these two diffusivity measures were not performed.
